# Microbiological, biochemical, physicochemical surface properties and biofilm forming ability of *Brettanomyces bruxellensis*

Maria Dimopoulou<sup>1\*</sup>, Margareth Renault<sup>2</sup>, Marguerite Dols-Lafargue<sup>1,3</sup>, Warren Albertin-Leguay<sup>1,3</sup>, Jean-Marie Herry<sup>2</sup>, Marie-Noëlle Bellon-Fontaine<sup>2</sup>, Isabelle Masneuf-Pomarede<sup>1,4</sup>

1. UR Oenologie EA 4577, USC 1366 INRA, Bordeaux INP, Université de Bordeaux, France

2. UMR Génie et Microbiologie des Procédés Alimentaires, GMPA, AgroParisTech, INRA, Université Paris-Saclay, 78850 Thiverval-Grignon, France

3. ENSCBP, Bordeaux INP, 33600 Pessac, France

4. Ecole Nationale Supérieure des Sciences Agronomiques de Bordeaux-Aquitaine, France

## Abstract

*Brettanomyces bruxellensis* is a serious source of concern for winemakers. The production of volatile phenols by the yeast species confers to wine unpleasant sensory characteristics which are unacceptable by the consumers and inevitably provoke economic loss for the wine industry. This ubiquitous yeast is able to adapt to all winemaking steps and to withstand various environmental conditions. Moreover, the ability of *B. bruxellensis* to adhere and colonize inert materials can be the cause of the yeast persistence in the cellars and thus recurrent wine spoilage. We therefore investigated the surface properties, biofilm formation capacity and the factors which may affect the attachment of the yeast cells to surfaces with eight strains representative of the genetic diversity of the species. Our results show that the biofilm formation ability is strain-dependent and suggest a possible link between the physicochemical properties of the studied strains and their corresponding genetic group.

\* Corresponding author: Maria Dimopoulou [marouladimo@aia.gr](mailto:marouladimo@aia.gr)

**Key words:** *Brettanomyces bruxellensis*, wine spoilage, biochemical properties, physico-chemical surface properties, biofilm

## 1 **Introduction**

2 The process of fermentation has been used for years to improve the shelf-life and the sensory properties of  
3 food and beverages. Even if nowadays, the fermentation is often carried out from monocultures of a single  
4 fermentative strain, the traditional process usually involves a multitude of different microorganisms naturally  
5 present in the environment (Liu et al. 2017). These microorganisms produce a vast variety of aromatic  
6 molecules, and while some of them ameliorate the sensory profile and satisfy the consumers, some others  
7 cause sensory defects and product rejection (Belda et al. 2017; Tempère et al. 2018). The *B. bruxellensis*  
8 species may belong to both categories, depending on the production process and the final product  
9 characteristics. This yeast species can be desirable in kombucha and beer production, while in wine, it is  
10 considered as the source of major organoleptic defects (Chatonnet et al. 1992, 1995; Steensels et al. 2015).  
11 Actually, the capacity of *B. bruxellensis* to produce volatile phenols, that impart a "stable" or "horse-sweat"  
12 odor, can cause a drop in wine quality and in some cases the product becomes unfit for sale (Agnolucci et al.  
13 2017).

14 Recently, the genome sequencing of *B. bruxellensis* demonstrated a great intraspecific genetic diversity and  
15 in particular, a variability of the ploidy level (Fournier et al. 2017; Borneman et al. 2014). A rapid, reliable  
16 and discriminating method has been developed as a tool for genetic typing of *B. bruxellensis* strains using  
17 specific microsatellite markers (Albertin et al. 2014; Avramova et al. 2018a). Based on this method, a great  
18 number of *B. bruxellensis* isolates from various niches (beer, wine, cider, bioethanol, kombucha) and  
19 geographical areas were genotyped. The population structure analysis revealed three main genetic clusters  
20 and three sub-clusters associated with the strains ploidy level and substrates of isolation. Interestingly, the  
21 strain tolerance/resistance to sulfur dioxide, the main antimicrobial compound used in wine differs from one  
22 genetic cluster to the other, unraveling a strong link between genotype and this phenotypic trait (Avramova  
23 et al. 2018a, b). Other methods have been developed to control the spoilage yeast growth, as for example  
24 inactivation by heat or pressure, sterilizing filtration or through the use of ionized radiation. However these  
25 techniques are often expensive and may have a negative impact on sensory properties, which makes them  
26 incompatible with the production of high quality wines (Gerland 2010). In addition, the majority of the  
27 current techniques do not systematically eliminate the entire population of *B. bruxellensis*. This situation  
28 may be explained by the high intraspecific genetic and phenotypic diversity observed within the yeast  
29 species that differentiates some strains and increases their adaptation mechanism. Indeed, the repeated use of  
30 high doses of the antimicrobial agent sulphur dioxide to control the development of *B. bruxellensis* during  
31 winemaking, may have led to the emergence of more resistant strains which can tolerate the current used  
32 doses (Avramova et al. 2018b; Capozzi et al. 2016; Curtin et al. 2012; Conterno et al. 2010; Dimopoulou et  
33 al. 2019).

34 This yeast is able to survive and multiply in wine, especially in case of sluggish fermentation and difficulties  
35 of other species to monopolize the wine ecosystem (Renouf et al. 2006; Romano et al. 2008). Even if *B.*  
36 *bruxellensis* was detected at low level on grape berry, repetitive infections were observed in wine, suggesting  
37 that the cellar, rather than the vineyard, could be the main source of contamination (Barata et al. 2008;  
38 Garde-Cerdan and Ancin-Azpilicueta 2006; Gonzales-Arenzana et al. 2013; Rubio et al. 2015). Despite the  
39 fact that wine is not produced continuously throughout the year, yeast persistence in the cellars was

40 demonstrated from year to year (Grangeteau et al. 2016). However, the mechanism by which yeasts persist in  
41 the winery is not yet elucidated.

42 Yeast cells possess a remarkable ability to adhere to abiotic surfaces, in particular in response to stress and  
43 nutrient limitation (Verstrepen and Klis 2006). Adhesion to surfaces and subsequent biofilm formation  
44 enable long-term survival of fungi and bacteria in unfavorable nutrient environments (Tek et al. 2018).  
45 Moreover, disinfectants are not able to penetrate the biofilm matrix and possibly the resistance to anti-  
46 microbial compounds or cleaning agents could be related to the ability of microorganism to form biofilm  
47 (Carpentier and Cerf 1993; Perpetuini et al. 2018). Yeast adhesion is one of the most plastic and variable  
48 examined phenotype, while the attachment ability of closely genetic related strain could vary dramatically  
49 (Verstrepen and Klis 2006). Adhesion to abiotic surfaces is the first step in biofilm formation and depends on  
50 the physico-chemical properties of cells as well as of materials surfaces. The cell surface properties are  
51 linked to the molecular composition of the wall and other external elements of the micro-organisms. In  
52 *Saccharomyces cerevisiae*, the attachment to plastic and mat formation requires Flo11p, a member of the  
53 large family of fungal cell surface glycoproteins (Reynolds and Fink 2001). The same authors showed that  
54 mat formation and cell architecture structure is modified as yeast ploidy level increases. Surface proteins  
55 such as adhesins can also increase the cell-surface hydrophobicity and promote hydrophobic interaction  
56 between the cells and abiotic surfaces (Kang and Choi 2005).

57 Joseph et al. (2007) showed that the majority of the *B. bruxellensis* isolates studied were able to produce  
58 biofilm onto polystyrene surface, upon long incubation time in the presence of low sugar concentration.  
59 However, this first study did not consider the genetic diversity of the species, nor the growth rate and yield of  
60 the studied strains.

61 In this paper, various methods were tested to examine the microbiological, biochemical, physicochemical  
62 surface properties and biofilm forming ability of a panel of strains of *B. bruxellensis*, representative of the  
63 species genetic diversity. A putative correlation between these different properties and the strain genotype  
64 has been examined.

65

## 66 **Materials and Methods**

### 67 **Strains and growth conditions**

68 *B. bruxellensis* isolates were obtained from a variety of regions and fermented substrates, being part of the  
69 CRB Oenologie collection (Centre de Ressources Biologiques Œnologie, Bordeaux, France). The eight  
70 strains used in this study and their genetic group (Avramova et al. 2018a) are listed in Table 1. Their  
71 distribution on the genetic dendrogram is presented in Fig. 1. Firstly, all strains were spotted onto YPD  
72 medium containing 1% (w/v) yeast extract (Difco Laboratories, Detroit,), 2% (w/v) Bacto peptone (Difco),  
73 and 1% (w/v) glucose and agar (20g/L) and incubated for 5 days at 25°C. One cm<sup>2</sup> of solid culture was then  
74 inoculated into 40 mL sterile Erlenmeyer flasks containing liquid YPD broth, placed at 25°C at 150 rpm, for  
75 48h and then transferred into 250 mL liquid YPD culture for 10 days until the stationary growth phase,  
76 collected at density from 2,89 (strain L0417) to 4 (strain CBS 2499 and AWRI1608).

77

## 78 **Microbiological characteristics**

### 79 *Mat formation*

80 Yeast strains were evaluated for their ability for mat formation as described by Reynolds and Fink (2001),  
81 Briefly, 10  $\mu$ L of liquid culture in YPD were spotted onto YPD with 1.5% (w/v) agar. The plates were then  
82 incubated for 17 days at 25°C and photographed using wide angle digital camera (Nikon, Coolpix P500).  
83 Analyses were performed in duplicate except for the strain GSP1504.

84

### 85 *Biofilm biomass quantification to polystyrene microtiter plates*

86 Biofilm formation was quantified using a colorimetric microtiter 96 well polystyrene plate (Thermo  
87 Scientific Nunc MicroWell) by a method adapted from O'Toole et al. (2000) (Tek et al. 2018). The eight  
88 strains were grown in YPD medium for 10 days until stationary growth phase and then inoculated in YPD or  
89 in wine like medium (45% Sauvignon juice, 50% water and 5% ethanol). The OD of inoculum was  
90 spectrophotometrically adjusted to 0.1 at 600 nm in order to calibrate all the strains at a similar initial  
91 population level and cells were suspended in YPD or in wine like medium. The inoculated media were  
92 aliquoted (200  $\mu$ L) in polystyrene microplate wells. Each strain was inoculated in eight replicate wells in two  
93 separate plates, while eight negative control wells containing only broth were also included in each plate.  
94 The plates were incubated without any agitation at 25°C for 15 days in a hermetic plastic box containing a  
95 glass of water to create a highly humid atmosphere and avoid evaporation. After 15 days of incubation, the  
96 suspended cells population was estimated by optical absorbance (OD 600 nm) by using a single well in  
97 which the broth was mixed with a micropipette. The other wells were gently washed twice with 200  $\mu$ L of  
98 0.9 % (v/v) NaCl, dried in an inverted position and stained with 1% (w/v) crystal violet. The wells were  
99 rinsed again and the crystal violet was solubilized in 100 $\mu$ L of ethanol:acetone (80:20, v/v). The absorbance  
100 at 595 nm was determined using a microplate reader (Molecular devices).

101

## 102 **Biochemical characteristics**

### 103 *Cell lipid extraction*

104 After 10 days of growth in YPD medium, cells were collected and a sample corresponding to  $2 \times 10^9$  cells was  
105 withdrawn. Cell concentration was estimated by flow cytometry and optical density (OD 600nm). Then each  
106 sample was washed twice with distilled water, frozen with liquid nitrogen and conserved at -20°C in  
107 Eppendorf tubes. From the frozen samples obtained previously, the membrane lipid extraction was realized  
108 according to the protocol of Tronchoni et al. (2012) with some slight modifications. In each tube, 1 g of glass  
109 beads (0.5 mm, Biospec Products), 700  $\mu$ L of cold methanol and 140  $\mu$ L of EDTA 0.1M were added and  
110 vigorously mixed (4 x 45 s) in a mini-bead-beater-8 (Biospec Products, Qiagen). By this way, the cell  
111 membrane wall was completely disordered and the liquid phase was separated from the glass beads by  
112 centrifugation and transferred into a 15 mL glass screw tube. Lipid extraction was performed in three steps,  
113 starting with the addition of 2.5 mL chloroform/methanol (1:1, v/v, for 45 min), centrifugation (3000 rpm, 5  
114 min) and recuperation of the inferior phase. Then 2.5 mL of chloroform/methanol (2:1, v/v, for 45 min) were  
115 added and the inferior phase was recuperated as before. The last extraction was realized by adding 2.5 mL  
116 chloroform/methanol (1:2, v/v, for 45 min). The inferior organic phases was transferred to a 15 mL glass

117 screw tube and cleaned twice by adding KCl 0.88% (1/4 of a total volume of the extract). After vortexing  
118 and cooling at 4°C for 30 min, the samples were centrifuged (3000 rpm, 5 min) and the inferior organic  
119 phase was collected and stored at -80°C until analysis.

120

#### 121 *Fatty acid determination*

122 The extracted lipids were concentrated to dryness under nitrogen stream and then methylated by the presence  
123 of methanol and sulphuric acid (5% v/v) for 2 h at 85°C in the presence of 50 µg heptanoic acid (Sigma  
124 Aldrich) as internal standard. Then the addition in the same tube of 1 mL of NaCl (2.5% w/v) and 2 mL of  
125 hexane enabled the extraction of methylic esters from the fatty acids, which were concentrated to dryness  
126 under nitrogen stream. Finally 200 µL of hexane were added to fatty acids extract and their relative  
127 concentrations were determined by Gas Chromatography coupled with Flame Ionisation, as described by  
128 Redon et al. (2009).

129

#### 130 *Exopolysaccharides quantification*

131 After 10 days of growth in YPD broth, soluble exopolysaccharides (EPS) liberated by the yeasts were  
132 collected in the culture supernatant. The total excreted polysaccharides were precipitated (Dimopoulou et al.  
133 2016) and their concentration was determined according to the anthrone-sulfuric method with glucose as  
134 standard (Ludwig and Goldberg 1956). For each sample, the polymer precipitation and assays were done in  
135 triplicate. The EPS quantification results were normalized by the cell population after 10 days of growth (OD  
136 600 nm).

137

### 138 **Surface physicochemical properties**

#### 139 *Preparation of yeasts suspensions characteristics*

140 The physicochemical characterization of *B. bruxellensis* strains was carried out for cells grown in YPD  
141 broth. Briefly, cells were harvested by centrifugation (Eppendorf) at 4°C for 10 min at 7000 g and then  
142 washed twice with and re-suspended in the relevant suspending liquid (NaCl 150mM or 1.5 mM). All  
143 experiments were performed on three separately grown cultures.

144

#### 145 *Measurement of electrophoretic mobility (EM)*

146 The electrophoretic mobility (EM) of yeast in a sodium chloride solution (1.5 mM) was measured as a  
147 function of the pH within the range of 2 to 5, adjusted by the addition of HNO<sub>3</sub>. The concentration of the  
148 suspension was approximately at 10<sup>7</sup> cells/mL. Measurements were taken in a 50 V/cm electric field with a  
149 laser zetameter (CAD Instruments, France). For each measurement, results were based on the automated  
150 video analysis of about 200 cells. Each experiment was performed twice.

151

#### 152 *Microbial adhesion to hydrocarbon*

153 Microbial adhesion to hydrocarbon (MATH) enables the evaluation of the hydrophobic/hydrophilic character  
154 of the cell surface of *B. bruxellensis* strains (Bellon-Fontaine et al. 1996). Experimentally, yeast suspension  
155 (1.5 mL) was mixed with 0.25 mL of each solvent (hexadecane, decane). The mixture was stirred for 2 min

156 to form an emulsion and a rest period of 15 min allowed the complete separation of the two phases. The  
157 optical density (OD) of the aqueous phase and that of the initial cell suspension (OD<sub>0</sub>) were measured at 400  
158 nm. The microbial affinity to each solvent was calculated using the formula:  
159

$$affinity = \left(1 - \frac{OD}{OD_0}\right) \times 100$$

160  
161 Each experiment was performed twice.  
162

### 163 **Statistical analysis**

164 Kruskal-Wallis statistical test (agricolae package, R, p-value < 0.05) and Principal Component Analysis  
165 (PCA) were performed using R-package.

## 166 **Results**

### 167 **Microbiological characteristics**

168 Eight strains of *B. bruxellensis* belonging to distinct genetic groups were used: two diploid strains (belonging  
169 to the genetic group dark cyan, CBS2499\_like), three triploid strains (red group AWRI1499\_like), two  
170 triploid strains (orange group AWRI1608\_like) and a triploid tequila / bioethanol group strain (blue group,  
171 CBS5512 like) (Table 1, Fig. 1).

172 **Table 1 The eight *B. bruxellensis* strains used in this study**

| Strain     | Group color | Genetic group*                 | Substrate of isolation |
|------------|-------------|--------------------------------|------------------------|
| AWRI1499   | red         | triploid, wine                 | red wine               |
| L14190     | red         | triploid wine                  | red wine               |
| L0417      | red         | triploid wine                  | red wine               |
| 1911-MX-V1 | darkcyan    | diploid, wine                  | red wine               |
| CBS 2499   | darkcyan    | diploid, wine                  | red wine               |
| AWRI1608   | orange      | triploid, beer                 | red wine               |
| GSP1504    | orange      | triploid, beer                 | beer                   |
| CBS 6055   | blue        | triploid<br>tequila/bioethanol | beer                   |

173  
174 \*according to Avramova *et al.*, 2018a  
175

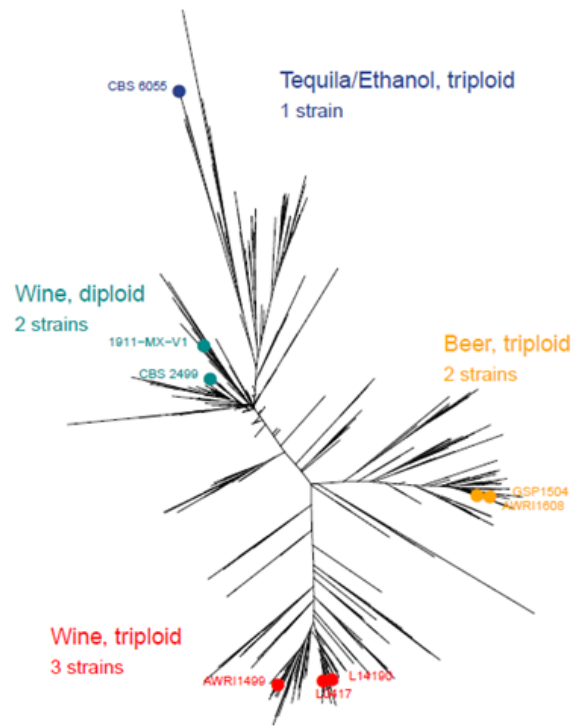

176

177

178

179

180

181

182

183

**Fig. 1** Position of the eight *B. bruxellensis* strains in a dendrogram of 1488 strains (Avramova et al. 2018a)

The mat formation of the eight strains was observed after 17 days on YPD plate (Fig. 2). The diameter of the mats varied between 9 mm (1911-MX-V1) and 15 mm (CBS 6055). All the other strains displayed mats with a diameter ranged from 11 to 13 mm. CBS 6055 was the only strain exhibiting mat with rough edges. No relation between ploidy level and preliminary mat formation was observed

184

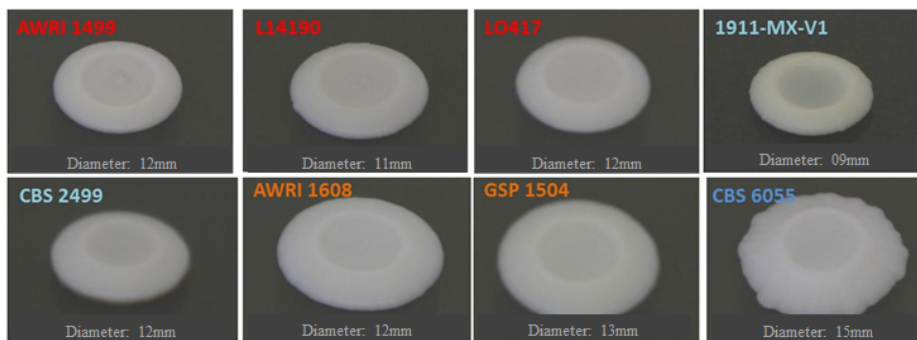

185

186

187

188

189

190

191

192

193

194

195

196

**Fig. 2** Photos of colony morphology taken by camera of the eight tested strains of *B. bruxellensis* after 17 days of growth at YPD plate.

The *B. bruxellensis* strains were then studied for their biofilm forming ability in polystyrene microtiter plates, in two different media, YPD and a Sauvignon must derived wine-like medium. As shown in Fig. 3, the medium composition changed significantly the biofilm formation ability of the strains belonging to the darkcyan, red and blue genetic groups. More precisely all the strains in these groups, expressed increased biofilm capacity in wine-like medium compared with in YPD broth. On the contrary, the two strains in the orange genetic group showed a similar performance in wine-like and YPD broth. Furthermore, in wine-like medium, the strain CBS 2499 displayed the highest biofilm formation ability whereas CBS 6055 displayed the lowest biofilm formation ability.

196

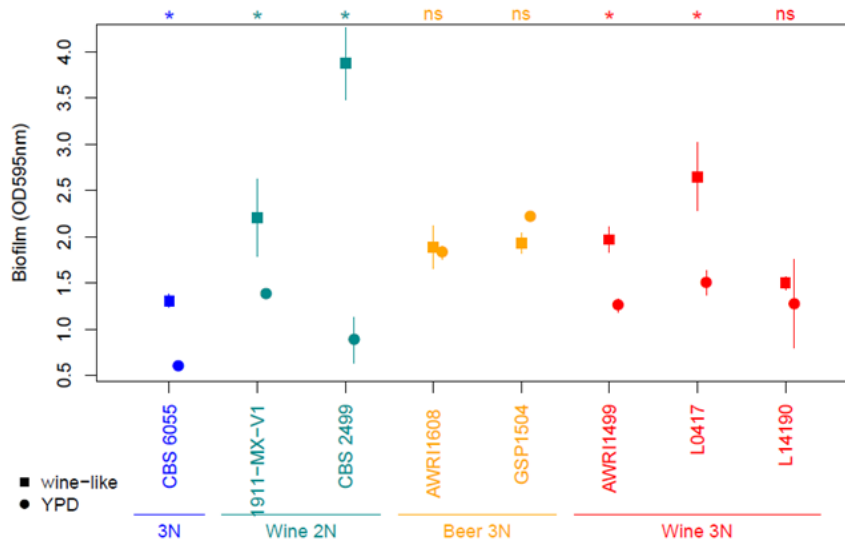

197

198 **Fig. 3** Biofilm formation ability of the eight *B. bruxellensis* strains in two different growth media; wine like and YPD.  
 199 The colors represent the genetic group of the strains. Upper stars or “NS” denote respectively significant difference  
 200 between media or “non-significance” as defined by Kruskal-Wallis statistical test (agricolae package, R, p-value <  
 201 0.05).  
 202

### 203 Biochemical characteristics

#### 204 Fatty acids composition

205 Fatty acids content was also studied in the eight selected strains. The total fatty acids content was in the same  
 206 order of magnitude for the eight strains. However the strains differed by the fatty acid proportions.  
 207 Interestingly, the SFA (Saturated Fatty Acids) to MUFA (Monounsaturated Fatty Acids) ratio was similar for  
 208 each genetic subpopulation studied (Fig. 4). The highest content of SFAs, 91% of the total membrane fatty  
 209 acids amount, was observed for the strains L14190, L0417 and AWRI1499. These three strains belonging to  
 210 the red genetic group were significantly different from most of the strains in the other groups, with a mean  
 211 SFA/MUFA ratio more than twice higher than the ratio of the other three genetic groups. On the contrary,  
 212 the strain AWRI1608 showed the lowest ratio level, composed at 73% of SFA.  
 213

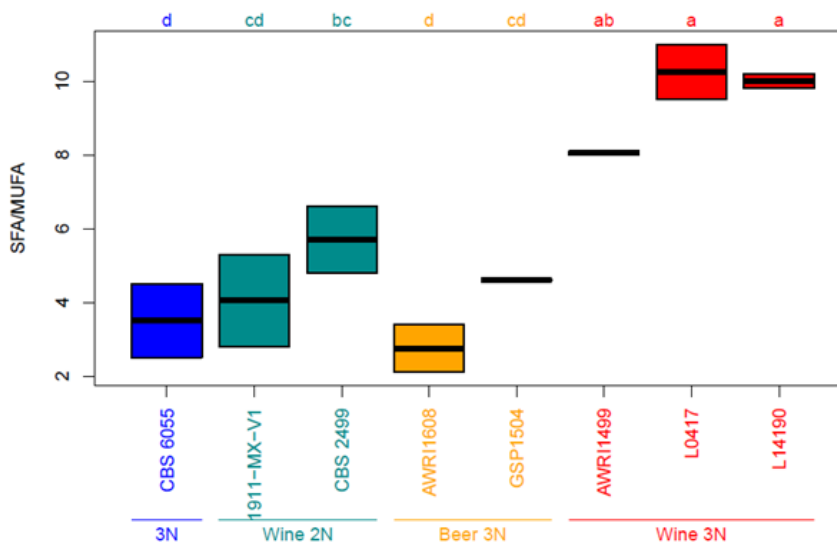

214



215 **Fig.4** Ratio of Saturated Fatty Acid to Monounsaturated Fatty Acid of the eight tested strains of *B. bruxellensis*. The  
216 colors represent the genetic group of the strains. Upper letters represent significance groups as defined by Kruskal-  
217 Wallis statistical test (agricolae package, R, p-value < 0.05).

218

#### 219 *Exopolysaccharides production*

220 The *B. bruxellensis* strains were examined for their ability to liberate exopolysaccharides (EPS) after growth  
221 in YPD medium for 10 days until reaching stationary growth phase. The results are presented as the ratio of  
222 total amount of EPS (mg/L) produced to the cell population (OD at 600 nm) (Fig. 5). The best-producing  
223 strains were CBS 6055 and L0417, which liberated more than 100 mg/L/OD of soluble exopolysaccharides  
224 in the culture medium. On the other hand, the strain 1911-MX-V1 liberated less than 40 mg/L/OD of EPS.  
225 Even if the EPS production ability of the eight studied strains could not be significantly distinguished  
226 according to their genetic group, the strains of the darkcyan genetic group displayed the lower EPS liberating  
227 ability, with a mean production of 51.5 mg/L/OD.

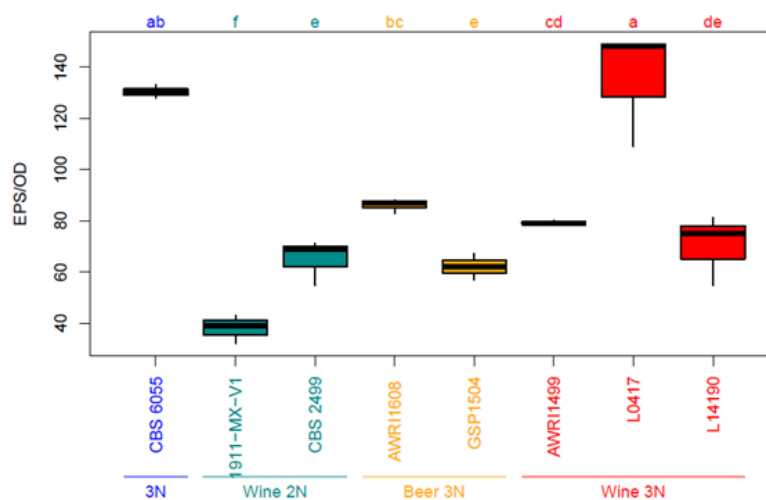

228

229 **Fig. 5** Exopolysaccharide production of the eight tested strains of *B. bruxellensis*. The colors represent the genetic  
230 group of the strains. Upper letters represent significance groups as defined by Kruskal-Wallis statistical test (agricolae  
231 package, R, p-value < 0.05).

232

#### 233 **Surface physicochemical characteristics**

234 The electrophoretic mobilities (EM) of the eight *B. bruxellensis* strains were measured at seven different pH  
235 values (from 2 to 5). The EM values of each strain suspended in 1.5 mM NaCl revealed negatively charged  
236 cells at pH values between 2 and 5 (Fig. 6). No isoelectric point could be determined within the range of pH  
237 values investigated but a reduction in mobility could be observed at pH 2. In our experimental conditions and  
238 whatever the tested pH, AWRI 1608, GSP 1504 and CBS 6055 (orange and blue genetic group) exhibited  
239 greater electronegativity than AWRI 1499, L0417, L14190, CBS 2499 and 1911-MX-V (red and darkcyan  
240 genetic group). Moreover, from an oenological point of view, in wine conditions (pH close to 3.5), the two  
241 strains from the orange genetic group were the less electronegative.

242 The eight *B. bruxellensis* strains were also assayed for their affinity to apolar solvents, decane and  
243 hexadecane, with the MATH analysis test. According to our results the affinity of *B. bruxellensis* strains for  
244 hexadecane or decane, values ranged from 0 to 25.6% (Table 2) reflecting hydrophilic surfaces

245 characteristics. It could be noted that in the darkcyan group, only CBS 2499 strain displayed the higher  
 246 affinity for both solvents.  
 247

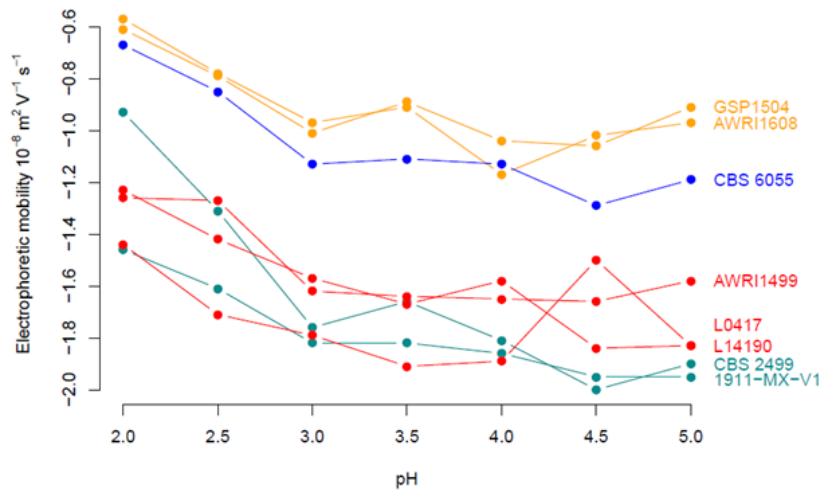

248 **Fig. 6** Electrophoretic mobility according to the pH of the eight strains of *B. bruxellensis*. The colors represent the  
 249 genetic group of the strains. The standard deviations of EM do not exceed 0.2 for all yeasts.

250  
 251 **Table 2** Percentage of affinity to the hexadecane and decane used in the MATH analysis for the eight *B. bruxellensis*  
 252 strains studied. The standard deviations of % affinity do not exceed 0.5.

| Strains | 1911-MX-V1 | CBS 2499 | AWRI1499 | L0417 | L14190 | AWRI1608 | GSP1504 | CBS 6055 |
|---------|------------|----------|----------|-------|--------|----------|---------|----------|
| % HD    | 0          | 21.5     | 0        | 0     | 0      | 1.7      | 8.1     | 0.3      |
| % D     | 0          | 25.6     | 0        | 0     | 0      | 2.8      | 11.9    | 2.9      |

255  
 256

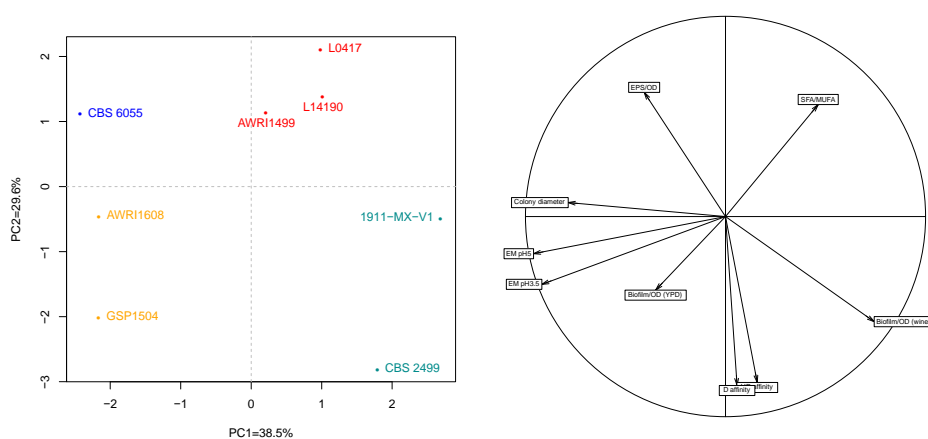

257  
 258  
 259 **Fig. 7** Principal-component analysis of combined data.

260  
 261  
 262 **PCA**  
 263 Principal-component analysis of combined data is shown in Fig.7. In this representation, the abscissa  
 264 represented 38.5% of the total variation from the original data set and was mainly correlated with a lower

265 negative charge of yeast cells and the mat formation. The ordinate, which represented 29.6% of the total  
266 variation from the original data set was mainly correlated with EPS production. This axis was also negatively  
267 correlated with yeast cell affinity for nonpolar solvents as well as biofilm formation in wine. This Principal-  
268 component analysis clearly distinguishes the yeast strains according to their genetic group.

## 269 Discussion

270 In this study, different protocols were developed and applied in order to examine the microbiological,  
271 biochemical, physicochemical surface properties and biofilm forming ability of a panel of strains of *B.*  
272 *bruxellensis*, representative of the species genetic diversity. Considering the high intra-species genetic  
273 diversity of *B. bruxellensis*, our study considered isolates representative of the different genetic groups of the  
274 species (Avramova et al. 2018a).

275 Different mat diameters and aspect were reported for the first time. By using isogenic strains from haploid to  
276 tetraploid of *Saccharomyces*, Reynolds and Fink (2001) reported an inverse relation between ploidy level  
277 and mat formation. No such relationship has been observed in this study. However mat diameter has been  
278 correlated with the yeast surface charge related to the genetic group. In the same way and depending on the  
279 genetic group, the biofilm formation into polystyrene wells was differently affected by the growth medium.  
280 *Saccharomyces cerevisiae* biofilm forming ability was shown to be linked to glucose levels, with a reduction  
281 in complete absence of glucose (Reynolds and Fink 2001). This was shown to depend to *FLO11* transcription  
282 and glucose repression (Gagiano et al. 1999). In our experimental condition, glucose but also ethanol levels  
283 were higher in wine like medium compared to YPD, and two strains (1911-MX-V1 and CBS 2499) showed  
284 higher biofilm forming ability in the medium with the highest glucose concentration. However, opposite  
285 results were obtained for the two strains of the orange genetic group as biofilm formation ability was not  
286 significantly modulated by medium composition as noticed for the other strains, thus suggesting different  
287 adhesion or regulation mechanisms according to the genetic group considered.

288 Interestingly, this is the first time that the membrane total free fatty acids composition and the  
289 exopolysaccharide liberation capacity of the species have been studied. The total free fatty acids membrane  
290 composition has been used in the past as a typing method (Rozes et al. 1992) and was shown to play an  
291 important role in the cell permeability and adaptation mechanism especially under hostile environmental  
292 conditions like wine. Genes involved in lipid metabolism were showed to be enriched in *B. bruxellensis*  
293 genome with some genes that may contribute to ethanol tolerance of the species (Woolfit et al. 2007). Recent  
294 study showed that the presence of sulfites leads to increased cell permeability (Longin et al. 2016). The three  
295 strains of the red genetic group are composed of a higher ratio of SFA/MUFA compared to the other genetic  
296 groups. Taking into consideration that this genetic group gathered mainly tolerant/resistant strains to high  
297 concentration of sulphur dioxide (Avramova et al. 2018a), a link between the two tested phenotypic traits but  
298 also with the genetic group could be suggested. Regarding end-point exopolysaccharide liberation, the strains  
299 CBS 6055 and L0417 displayed the highest production capacity, which may be due to either distinct  
300 mannoprotein composition or cell wall dynamics or to premature cell lysis compared to other strains.  
301 Differences are also noted concerning the physicochemical properties of the eight yeasts analyzed which all  
302 presented hydrophilic and negatively charged profiles. Indeed, EM measurements clearly indicate a greater  
303 electronegativity of the strains of the orange and blue genetic group in comparison with strains of red or

304 darkcyan genetic group. All these results suggest distinct wall composition and metabolism traits which can  
305 possibly affect the biofilm production capacity. Indeed, the wall polysaccharides are the first and most  
306 abundant component of the cell which comes in contact with the surfaces and can affect the microbial  
307 colonization ability (Ghafoor *et al.*, 2011; Sheppard and Howell 2016). According to previous studies, they  
308 may contribute positively or negatively to biofilm formation (Legras *et al.* 2016; Verstrepen and Klis 2006).  
309 From a general point of view, even if the strains number was low, our present study confirmed the fact that  
310 *B. bruxellensis* shows a great variability not only at genetic but also phenotypic level. The tested strains are  
311 clearly different regarding their cell surface properties and this may have significant consequences, firstly on  
312 their ability to primarily adhere to surfaces and secondly on their biofilm formation capacity. Additional  
313 work with a higher number of strains representative of the genetic groups and a close examination of the  
314 biofilm formation steps is now needed. The detection and identification of strains contaminating the cellar  
315 and the prediction of their persistence abilities seems to be an indispensable tool for the winemakers in order  
316 to better adapt their winemaking techniques and especially their cleaning procedures.

## 317 Acknowledgments

318 This work was supported by funds from FranceAgriMer. Lipids analysis was performed at the lipidomic  
319 platform of Bordeaux University.

## 320 References

- 321 Agnolucci M, Tirelli A, Cocolin L, Toffanin A (2017) *Brettanomyces bruxellensis* yeasts: impact on wine  
322 and winemaking. World J. Microbiol. Biotechnol 33(10):180
- 323 Albertin W, Panfili A, Miot-Sertier C, Goulielmakis A, Delcamp A, Salin F, Lonvaud-Funel A, Curtin C,  
324 Masneuf-Pomarede I (2014) Development of microsatellite markers for the rapid and reliable  
325 genotyping of *Brettanomyces bruxellensis* at strain level. Food Microbiol 42:188–195
- 326 Avramova M, Cibrario A, Peltier E, Coton M, Coton E, Schacherer J, Spano G, Capozzi V, Blaiotta G, Salin  
327 F, Dols-Lafargue M, Grbin P, Curtin C, Albertin W, Masneuf-Pomarede I (2018a) *Brettanomyces*  
328 *bruxellensis* population survey reveals a diploid-triploid complex structured according to substrate of  
329 isolation and geographical distribution. Sci Rep 7;8(1):4136
- 330 Avramova M, Vallet-Courbin A, Maupeu J, Masneuf-Pomarede I, Albertin W (2018b) Molecular Diagnosis  
331 of *Brettanomyces bruxellensis* Sulfur Dioxide Sensitivity Through Genotype Specific Method. Front  
332 Microbiol 9:1260
- 333 Barata A, Caldeira J, Botelho R, Pagliara D, Malfeito-Ferreira M, Loureiro V (2008) Survival patterns of  
334 *Dekkera bruxellensis* in wines and inhibitory effect of sulphur dioxide. Int. J. Food Microbiol 121:  
335 201–207
- 336 Barbin P (2006) Contrôle et éléments de maîtrise de la contamination par la levure *Brettanomyces* au cours  
337 du procédé de vinification en rouge. Thèse de Doctorat. INP toulouse
- 338 Belda I, Zarraonandia I, Perisin M, Palacios A, Acedo A (2017) From Vineyard Soil to Wine Fermentation:  
339 Microbiome Approximations to Explain the “terroir” Concept. Front Microbiol 8:821
- 340 Bellon-Fontaine MN, Rault J, Van Oss C (1996) Microbial adhesion to solvents: a novel method to  
341 determine the electron-donor/electron-acceptor or Lewis acid-base properties of microbial cells  
342 Colloids Surfaces B Biointerfaces 7:47-53
- 343 Borneman AR, Zeppel R, Chambers PJ, Curtin CD (2014) Insights into the *Dekkera bruxellensis* Genomic  
344 Landscape: Comparative Genomics Reveals Variations in Ploidy and Nutrient Utilisation Potential  
345 amongst Wine Isolates. PLoS 13;10(2):e1004161
- 346 Capozzi V, Di Toro MR, Grieco F, Michelotti V, Salma M, Lamontanara A, Russo P., Orrù L, Alexandre H,  
347 Spano G (2016) Viable But Not Culturable (VBNC) state of *Brettanomyces bruxellensis* in wine: New

- 348 insights on molecular basis of VBNC behaviour using a transcriptomic approach. *Food Microbiol* 59:  
349 196–204
- 350 Carpentier and Cerf (1993) Biofilms and their consequences with particular reference to hygiene in the food  
351 industry, *Journal of Applied bacteriology* 75:499-511
- 352 Chatonnet P, Dubourdieu D, Boidron J N (1992) Incidence des conditions de fermentation et d'élevage des  
353 vins blancs secs en barriques sur leur composition en substances cédées par le bois de chêne. *Sci.*  
354 *Aliments* 12:665–685
- 355 Chatonnet P, Dubourdieu D, Boidron JN (1995) The Influence of *Brettanomyces/Dekkera* sp. Yeasts and  
356 Lactic Acid Bacteria on the Ethylphenol Content of Red Wines. *Am. J. Enol. Vitic* 46:463–468
- 357 Conterno L, Fondazione E, Henick-Kling T (2010) Brettanomyces/Dekkera off-flavours and other wine  
358 faults associated with microbial spoilage, in: Reynolds, A.G. (Ed.), *Managing Wine Quality*,  
359 Woodhead Publishing Series in Food Science, Technology and Nutrition. Woodhead Publishing 346–  
360 387
- 361 Conterno L, Joseph CML, Arvik TJ, Henick-Kling T, Bisson LF (2006) Genetic and Physiological  
362 Characterization of *Brettanomyces bruxellensis* Strains Isolated from Wines. *American Journal of*  
363 *Enology and Viticulture* 57: 139-147
- 364 Curtin C, Kennedy E, Henschke PA (2012) Genotype-dependent sulphite tolerance of Australian *Dekkera*  
365 (*Brettanomyces*) *bruxellensis* wine isolates. *Lett. Appl. Microbiol* 55:56–61
- 366 Dimopoulou M, Bardeau T, Ramonet PY, Miot-Certier C, Claisse O, Doco T, Petrel M, Lucas P, Dols-  
367 Lafargue M (2016) Exopolysaccharides produced by *Oenococcus oeni*: from genomic and phenotypic  
368 analysis to technological valorization. *FoodMicrobiol* 53:10–17
- 369 Dimopoulou M, Hatzikamari M, Masneuf-Pomarede I, Albertin W (2019) Sulfur dioxide response of  
370 *Brettanomyces bruxellensis* strains isolated from Greek wine. *Food Microbiology* 78:155–163
- 371 Fournier T, Gounot JS, Freel K, Cruaud C, Lemainque A, Aury JM, Wincker P, Schacherer J, Friedrich A  
372 (2017) High-Quality de Novo Genome Assembly of the *Dekkera bruxellensis* Yeast Using Nanopore  
373 MinION Sequencing. *G3 (Bethesda)* 5;7(10):3243-3250
- 374 Gagiano M, van Dyk D, Bauer F, Lambrechts MG, Pretorius IS (1999. B) Msn1p/Mss10p, Mss11p and  
375 Muc1p/Flo11p are part of a signal transduction pathway downstream of Mep2p regulating invasive  
376 growth and pseudohyphal differentiation in *Saccharomyces cerevisiae*. *Mol. Microbiol* 31:103–116
- 377 Garde-Cerdán T and Ancín-Azpilicueta C (2006) Review of quality factors on wine ageing in oak barrels.  
378 *Trends Food Sci. Technol* 17:438–447
- 379 Gerland C (2010) Nouvelles connaissances scientifiques et pratiques pour la prévention des déviations  
380 phénolées par les *Brettanomyces*. *Revue internet de viticulture et œnologie* N.4/1
- 381 Ghafoor A, Hay ID, Rehm BHA (2011) Role of exopolysaccharides in *Pseudomonas aeruginosa* biofilm  
382 formation and architecture. *Appl. Environ. Microbiol* 77:5238–5246
- 383 González-Arenzana L, Santamaría P, López R, Garijo P, Gutiérrez AR, Garde-Cerdán T, López-Alfaro I  
384 (2013) Microwave technology as a new tool to improve microbiological control of oak barrels: A  
385 preliminary study. *Food Control* 30:536–539
- 386 Grangeteau C, Gerhards D, von Wallbrunn C, Alexandre H, Rousseaux S, Guilloux-Benatier M (2016)  
387 Persistence of Two Non-Saccharomyces Yeasts (*Hanseniaspora* and *Starmerella*) in the Cellar, *Front*  
388 *Microbiol* 7: 268
- 389 Joseph L, Kumar G, Su E, Bisson L.F (2007) Adhesion and biofilm production by wine isolates of  
390 *Brettanomyces bruxellensis*. *American Journal of Enology and Viticulture* 58(3):373-378
- 391 Kang S and Choi, H (2005) Effect of surface hydrophobicity on the adhesion of *S. cerevisiae* onto modified  
392 surfaces by poly (styrene-ran-sulfonic acid) random copolymers. *Colloids Surf B Biointerfaces* 46:  
393 70–77
- 394 Legras JL, Moreno-Garcia J, Zara S, Zara G, Garcia-Martinez T, Mauricio JC, Mannazzu I, Coi AL, Bou  
395 Zeidan M, Dequin S, Moreno J, Budroni M (2016) Flor Yeast: New Perspectives Beyond Wine Aging.  
396 *Front Microbiol* 7:503
- 397 Liu Y, Rousseaux S, Tourdot-Maréchal R, Sadoudi M, Gougeon R, Schmitt-Kopplin P, Alexandre H (2017)  
398 Wine microbiome: A dynamic world of microbial interactions. *Crit Rev Food Sci Nutr* 57:856–873

- 399 Longin C, Degueurce C, Julliat F, Guilloux-Benatier M, Rousseaux S, Alexandre H (2016) Efficiency of  
400 population-dependent sulfite against *Brettanomyces bruxellensis* in red wine. Food Res Int 89:620-630
- 401 Ludwig TG and Goldberg HJV (1956) The Anthrone Method for the Determination of Carbohydrates in  
402 Foods and in Oral Rinsing. Journal of Dental Research 35(1):90-94
- 403 O'Toole G, Kaplan HB and Kolter R (2000) Biofilm Formation as Microbial Development. Annual Reviews  
404 of Microbiology 54:49-79
- 405 Redón M, Guillamón JM, Mas A, Rozès N (2009) Effect of lipid supplementation upon *Saccharomyces*  
406 *cerevisiae* lipid composition and fermentation performance at low temperature. European Food  
407 Research and Technology 228: 833-840
- 408 Renouf V, Falcou M, Miot-Sertier C, Perello MC, De Revel G, Lonvaud-Funel A (2006) Interactions  
409 between *Brettanomyces bruxellensis* and the other yeast species during the first steps of winemaking. J  
410 Appl Microbiol 100:1208-1219
- 411 Reynolds T and G R Fink (2001) Bakers' yeast, a model for fungal biofilm formation. Science 291:878-881
- 412 Romano A, Perello MC, de Revel G, Lonvaud-Funel A (2008) Growth and volatile compound production by  
413 *Brettanomyces/Dekkera bruxellensis* in red wine. J Appl Microbiol 104(6):1577-85
- 414 Rozès N, Garcia-Jares C, Larue F, Lonvaud-Funel A (1992) Differentiation between fermenting and spoilage  
415 yeasts in wine by total free fatty acid analysis. Journal of the Science of Food and Agriculture 59:351-  
416 357
- 417 Rubio P, Garijo P, Santamaria P, Lopez R, Martinez J, Gutierrez A (2015) Influence of oak origin and ageing  
418 on wine spoilage by *Brettanomyces* yeasts Food Control 54: 176-180
- 419 Sheppard DC, Howell PL (2016) Biofilm Exopolysaccharides of Pathogenic Fungi: Lessons from Bacteria.  
420 J. Biol. Chem 291:12529-12537
- 421 Steensels J, Daenen L, Malcorps P, Derdelinckx G, Verachtert H, Verstrepen KJ (2015) *Brettanomyces*  
422 yeasts--From spoilage organisms to valuable contributors to industrial fermentations. Int. J. Food  
423 Microbiol 206:24-38
- 424 Tek EL, Sundstrom JF, Gardner JM, Oliver SG, Jiranek V (2018) Evaluation of the ability of commercial  
425 wine yeasts to form biofilms (mats) and adhere to plastic: implications for the microbiota of the  
426 winery environment. FEMS Microbiol Ecol 1:94(2)
- 427 Tempère S, Marchal A, Barbe JC, Bely M, Masneuf-Pomarede I, Marullo P, Albertin, W (2018) The  
428 complexity of wine: clarifying the role of microorganisms. Appl. Microbiol. Biotechnol 102 :3995-  
429 4007
- 430 Tronchoni J, Rozès N, Querol A, Guillamón JM (2012) Lipid composition of wine strains of *Saccharomyces*  
431 *kudriavzevii* and *Saccharomyces cerevisiae* grown at low temperature. Int. J. Food Microbiol  
432 155:191-198
- 433 Verstrepen KJ, Klis FM (2006) Flocculation, adhesion and biofilm formation in yeasts. Mol. Microbiol.  
434 60:5-15
- 435 Woolfit M, Rozpedowska E, Piskur J, Wolfe KH (2007) Genome survey sequencing of the wine spoilage  
436 yeast *Dekkera (Brettanomyces) bruxellensis*. Eukaryot Cell 6:721-733
- 437
- 438
